# Supplementary material for: Large-scale preparation of micro-gradient structured sub-micro fibrous membranes with narrow diameter distributions for high-efficiency air purification
Source: Royal Society of Chemistry journal article supplement (doi:10.1039/c9en00816k), 2019-01-01
Supplement: c9en00816k1.pdf [file c9en00816k1.pdf]

## Supplementary Information for

# **Large-scale preparation of micro-gradient structured sub-micro fibrous membrane with narrow diameter distribution for high- efficiency air purification**

Mengjuan Zhou <sup>a</sup>, Mengzhen Fang <sup>a</sup>, Zhenzhen Quan <sup>a, b</sup>, Hongnan Zhang <sup>a</sup>, Xiaohong Qin<sup>\*, a</sup>, Rongwu Wang<sup>\*, a</sup>, Jianyong Yu <sup>b</sup>

<sup>a</sup> Key Laboratory of Textile Science & Technology of Ministry of Education, College of Textiles, Donghua University, Shanghai 201620, P. R. China.

<sup>b</sup> Innovation Center for Textile Science and Technology, Donghua University, Shanghai 201620, China.

---

*\* Corresponding authors*

*E-mail addresses: [xhqin@dhu.edu.cn](mailto:xhqin@dhu.edu.cn) (X. Qin), [wrrw@dhu.edu.cn](mailto:wrrw@dhu.edu.cn) (R. Wang)*

**Table S1** The properties of PAN precursor solutions with different concentrations.

| Solutions | Electrical Conductivity ( $\mu\text{S cm}^{-1}$ ) | Surface tension ( $\text{mN m}^{-1}$ ) | Viscosity ( $\text{Pa s}$ ) |
|-----------|---------------------------------------------------|----------------------------------------|-----------------------------|
| 10.5%PAN  | 111.8                                             | 37.67                                  | 5.03                        |
| 13%PAN    | 127.3                                             | 37.82                                  | 6.11                        |
| 16%PAN    | 136.2                                             | 38.09                                  | 7.26                        |

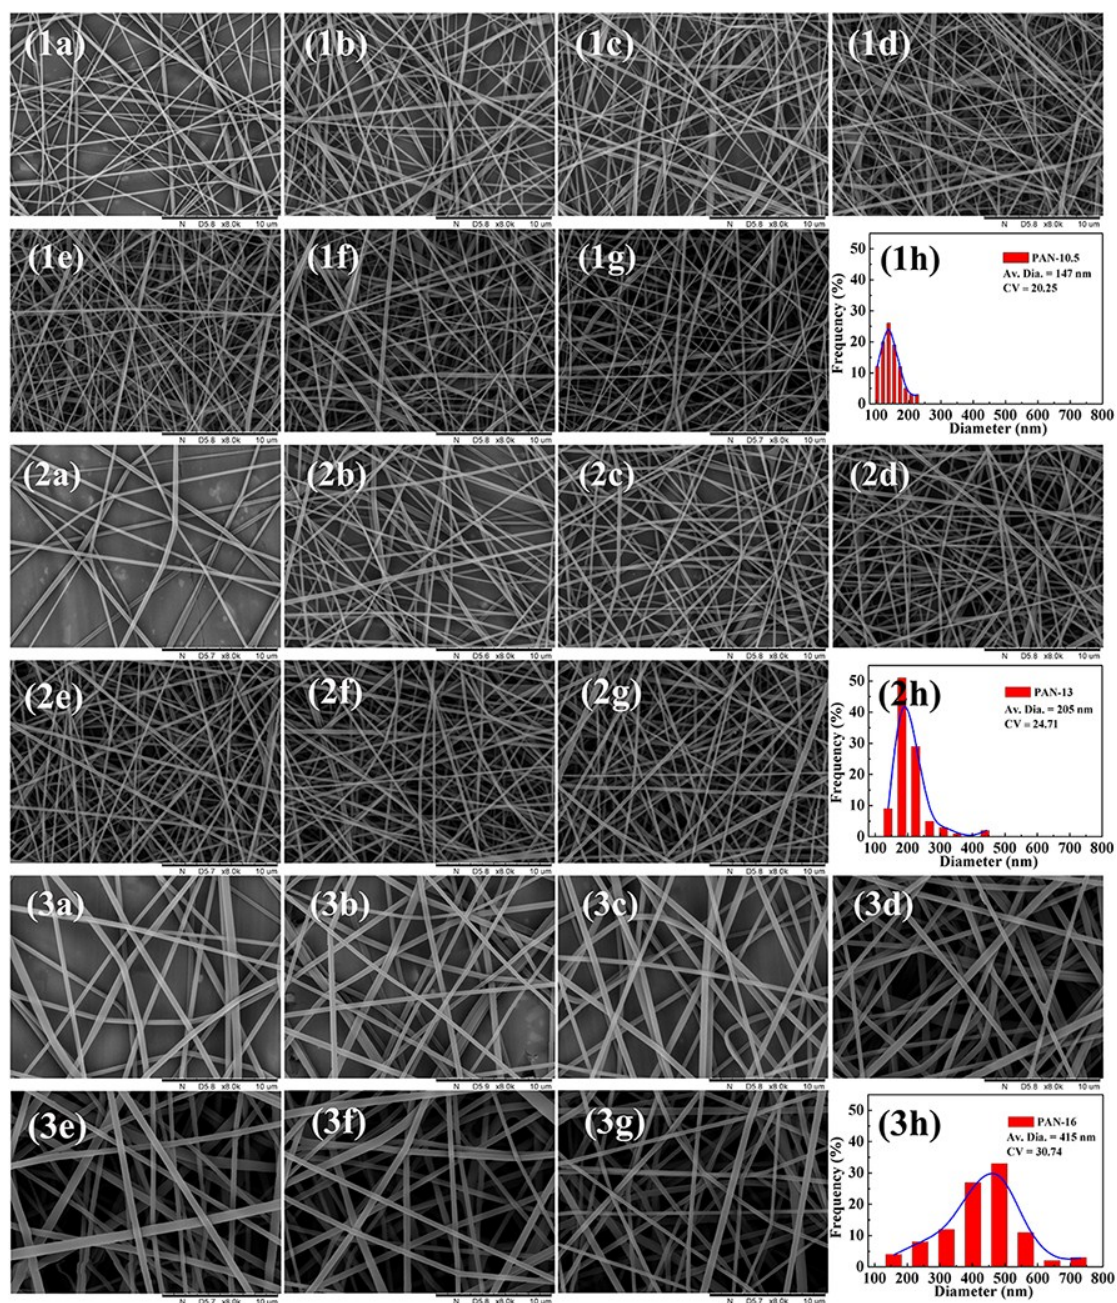

**Fig. S1** SEM images of PAN-10 (1), PAN-13 (2), PAN-16 (3) sub-micro fibers with different fabric substrate feeding speeds of (a) 0.8 m min<sup>-1</sup>, (b) 0.7 m min<sup>-1</sup>, (c) 0.6 m min<sup>-1</sup>, (d) 0.5 m min<sup>-1</sup>, (e) 0.4 m min<sup>-1</sup>, (f) 0.3 m min<sup>-1</sup>, and (g) 0.2 m min<sup>-1</sup>; (h) the diameter distributions of the sub-micro fibers.

**Table S2** Structure attributes of PAN sub-micro fibrous membranes with fabric substrate feeding speeds of 0.6 m min<sup>-1</sup>, 0.4 m min<sup>-1</sup>, and 0.2 m min<sup>-1</sup>.

| Samples  |     | Feeding speed of fabric substrate (m min <sup>-1</sup> ) | Thickness (μm) | Basis density (g m <sup>-2</sup> ) | Packing density |
|----------|-----|----------------------------------------------------------|----------------|------------------------------------|-----------------|
| PAN-10.5 | I   | 0.6                                                      | 1.9375         | 0.196                              | 0.0854          |
|          | II  | 0.4                                                      | 3.25           | 0.644                              | 0.1674          |
|          | III | 0.2                                                      | 5.9375         | 1.032                              | 0.147           |
| PAN-13   | I   | 0.6                                                      | 2.0625         | 0.224                              | 0.0917          |
|          | II  | 0.4                                                      | 3.75           | 0.596                              | 0.1342          |
|          | III | 0.2                                                      | 6.5            | 0.956                              | 0.1242          |
| PAN-16   | I   | 0.6                                                      | 4.125          | 0.72                               | 0.1474          |
|          | II  | 0.4                                                      | 8.1875         | 1.656                              | 0.1708          |
|          | III | 0.2                                                      | 10.5           | 2.42                               | 0.1947          |

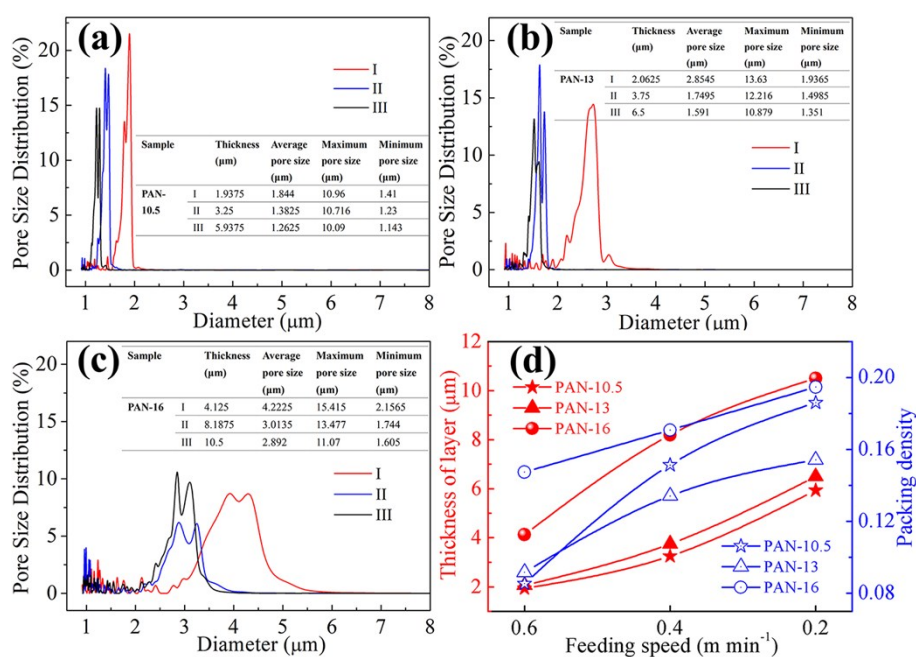

**Fig. S2** Pore size distributions of PAN-10.5 (a), PAN-13 (b), and PAN-16 (c) sub-micro fibrous webs with different fabric substrate feeding speeds of 0.6 m min<sup>-1</sup>, 0.4 m min<sup>-1</sup>, and 0.2 m min<sup>-1</sup>, thickness and packing density curves (d) of three kinds of PAN fibrous webs.



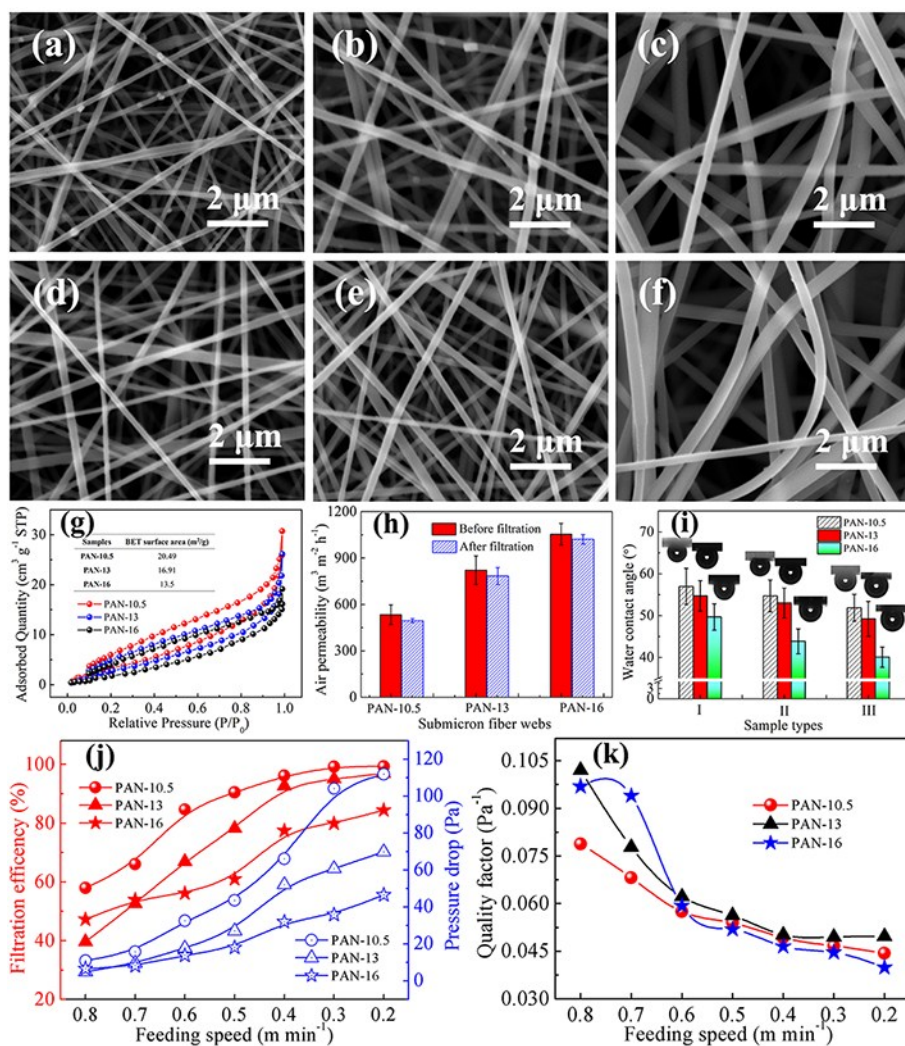

**Fig. S3** SEM images of windward (a, b, c) and leeward (d, e, f) sides of PAN-10.5 (a, d), PAN-13 (b, e), and PAN-16 (c, f) fibrous webs for III type, N<sub>2</sub> adsorption-desorption isotherms (g), the air permeability before and after filtration (h), and the water contact angles (i) of PAN-III fibrous webs, the filtration efficiency and pressure drop (j), and Qf values (k) of PAN-10.5, PAN-13, and PAN-16 fibrous webs with different fabric substrate feeding speeds.

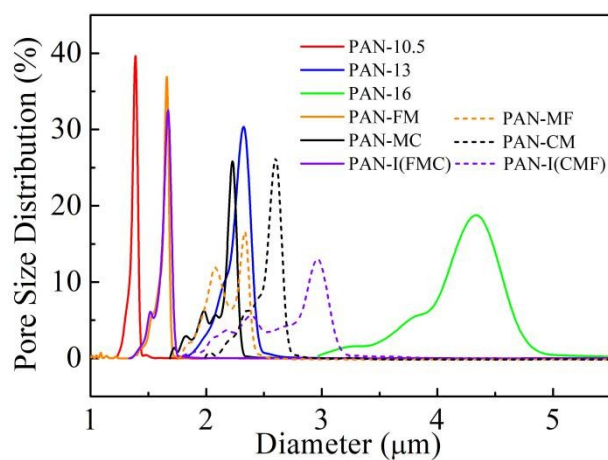

**Fig. S4** Pore size distribution curves of PAN-I sample and various layers.

**Table S3** Structure attributes and filtration performance of PAN-II composite membranes with different arrangements of three layers (C, M, F).

| Sample | Structure | Packing density (g cm <sup>-2</sup> ) | Thickness (μm) | MFP size (μm) | Pore size range (μm) | Filtration efficiency (%) | Pressure drop (Pa) | Qf (Pa <sup>-1</sup> ) |
|--------|-----------|---------------------------------------|----------------|---------------|----------------------|---------------------------|--------------------|------------------------|
| PAN-II | CMF       | 1.792                                 | 8.25           | 2.29          | 1.70~3.717           | 99                        | 32                 | 0.0879                 |
|        | FMC       |                                       |                | 1.544         | 1.384~2.331          | 99.278                    | 55.86              | 0.0883                 |
|        | MCF       | 1.76                                  | 8.31           | 1.583         | 1.293~2.63           | 99.85                     | 145.0              | 0.0448                 |
|        | FCM       |                                       |                | 1.346         | 1.245~2.028          | 99.88                     | 146.0              | 0.046                  |
|        | CFM       | 1.724                                 | 8.38           | 1.162         | 1.043~1.73           | 99.38                     | 104.9              | 0.0485                 |
|        | MFC       |                                       |                | 1.064         | 0.9553~1.58          | 99.46                     | 113.7              | 0.0459                 |

**Table S4** Structure attributes and filtration performance of each layer, double layers and micro-gradient layers for PAN-II composite membrane with MCF structure.

| Sample | Structure | Packing density (g cm <sup>-2</sup> ) | Thickness (μm) | Filtration efficiency (%) | Pressure drop (Pa) | Qf (Pa <sup>-1</sup> ) |
|--------|-----------|---------------------------------------|----------------|---------------------------|--------------------|------------------------|
| PAN-II | C         | 1.32                                  | 4              | 54.8                      | 16.66              | 0.0477                 |
|        | M         | 0.34                                  | 3              | 92.09                     | 48.02              | 0.0528                 |
|        | F         | 0.304                                 | 1.69           | 97.85                     | 60.76              | 0.0631                 |
|        | FC        | 1.67                                  | 5.68           | 98.61                     | 78.4               | 0.0545                 |
|        | FCM       | 1.76                                  | 8.31           | 99.88                     | 146.0              | 0.0461                 |
|        | MCF       |                                       |                | 99.85                     | 145.0              | 0.0448                 |

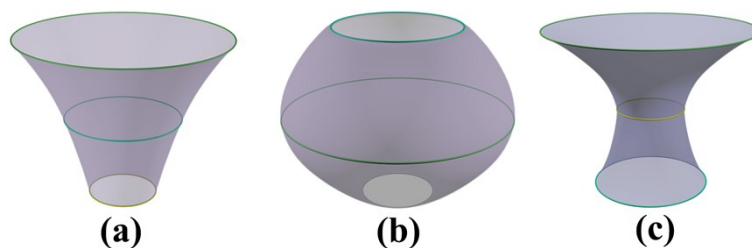

**Fig. S5** Equivalent pore size diagrams of CMF (a), MCF (b), and CFM (c) structures for PAN-II hybrid membranes with different arrangements of C, M, and F fibrous layers.

**Table S5** Pore size parameters of micro-gradient composite PAN/PMMA membrane for double sides.

| Samples  |     | MFP size (μm) | Pore size range (μm) |
|----------|-----|---------------|----------------------|
| PAN/PMMA | FMC | 1             | 0.9345~9.224         |
|          | CMF | 1.4           | 1.27~9.662           |

The simple setup of PM filtration equipment was displayed in Fig. S6(a). A moxa stick burning was placed in the right bottle as the PMs generating device, which of the right side was sealed with plastic wrap with several small holes to ensure connecting with the atmosphere, and the left side was connected to the filter medium clamp and fibrous filter was inserted in it with effective area of 15.9 cm<sup>2</sup>, the left bottle was connected with a circulating water pump providing circulating airflow passing through the test device. Various kinds of toxic gases were released by burning moxa stick, such as SO<sub>2</sub>, CO, CO, benzene, xylenes, and so on, which of size was distributed broadly from 0.3 μm to 10 μm.<sup>1</sup> The white smoke with high PMs mass concentration of >500 μg m<sup>-3</sup> produced could diffuse from right bottle to left bottle without fibrous filter (Fig. S6(b)), conversely was blocked with fibrous filter, so the left bottle was transparent (Fig. S6(c)), reflecting the excellent filtration performance of prepared fibrous membrane.

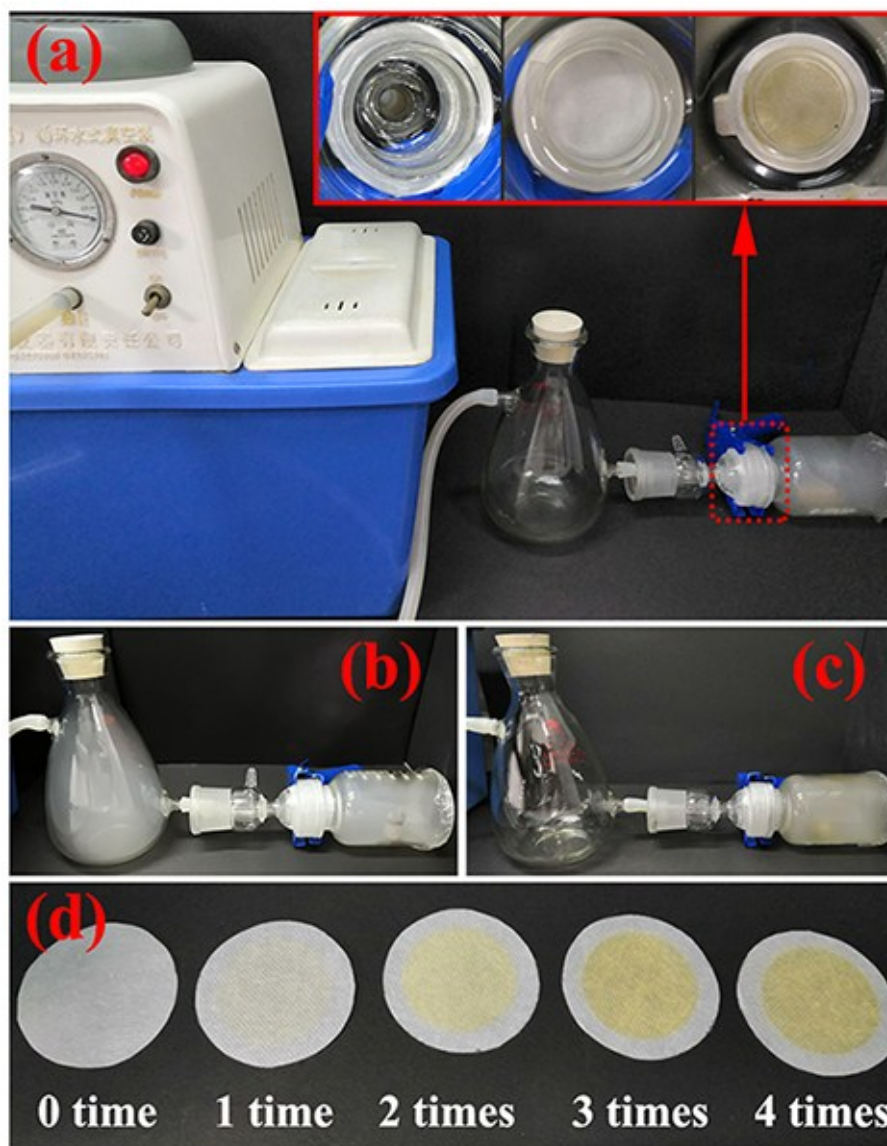

**Fig. S6** PMs filtration equipment (a), the smoke diffused from right bottle to left bottle without fibrous filter (b), the smoke was blocked with prepared fibrous filter (c), and pictures of windward surface of fibrous filter after different filtration times.

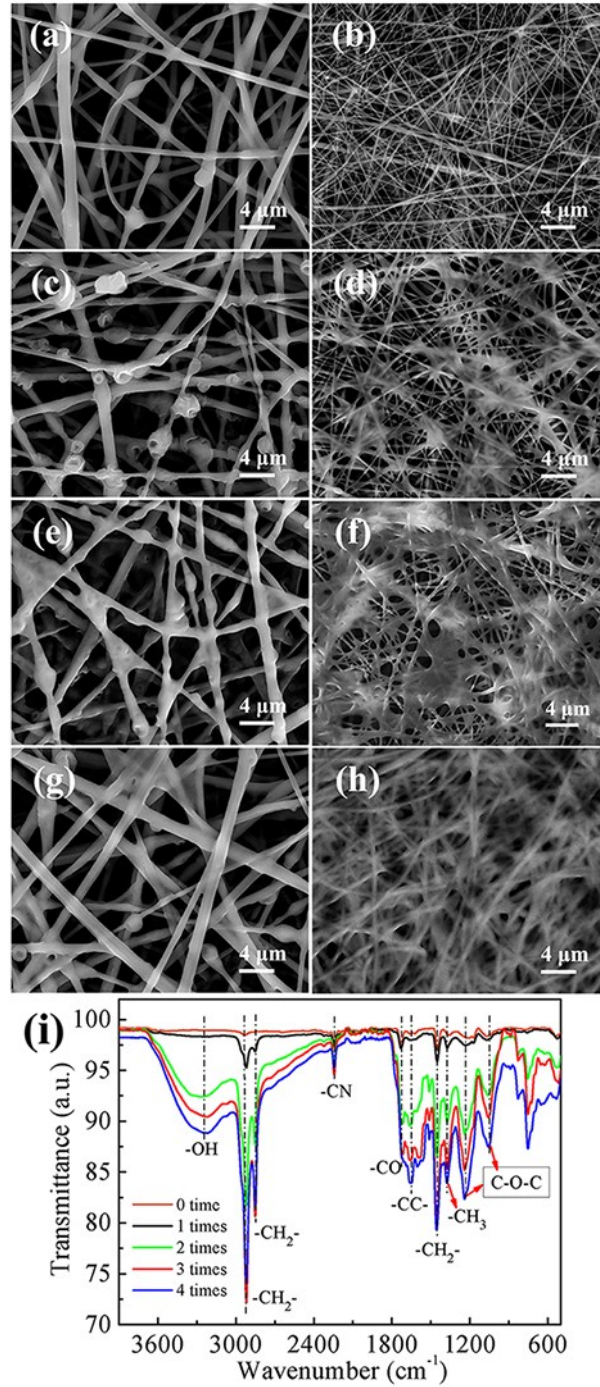

**Fig. S7** SEM images of PAN-II composite membranes after PM<sub>2.5</sub> dynamic filtration with different filtration times of (a) and (b) 1 time, (c) and (d) 2 times, (e) and (f) 3 times, and (g) and (h) 4 times, among of (a, c, e, g) were the windward surface and (b, d, f, h) were the leeward surface; (i) FTIR spectroscopy for PAN-II composite membranes after filtration.



**Table S6** Knudsen number and equilibrium factor values of fibrous layers for micro-gradient PAN/TiO<sub>2</sub>, PAN/SWCNTs, and PAN/PMMA composite membranes.

| Samples         | PAN/TiO <sub>2</sub> | PAN/SWCNTs | Micro-gradient PAN/PMMA composite |       |       |
|-----------------|----------------------|------------|-----------------------------------|-------|-------|
| Fibrous layer   | F                    | F          | C                                 | M     | F     |
| $d_f/\text{nm}$ | 140                  | 80         | 200                               | 110   | 72    |
| $K_n$           | 0.933                | 1.633      | 0.653                             | 1.187 | 1.814 |

## References

1. H. Gao, Y. Yang, A. Obed, J. Hou, H. Zhang, X. Qin, A low filtration resistance three-dimensional composite membrane fabricated via free surface electrospinning for effective PM 2.5 capture, *Environ. Sci. Nano*, 2017, **4**, 864-875.
